# Supplementary material for: Problems identified by dual sensory impaired older adults in long-term care when using a self-management program: A qualitative study
Source: PubMed Central journal article supplement (PMC5360251; doi:10.1371/journal.pone.0173601), 2017-03-21
Supplement: pone.0173601.s002.pdf [file pone.0173601.s002.pdf]

**S1 Figure. CONSORT FLOW DIAGRAM OF THE cRCT**

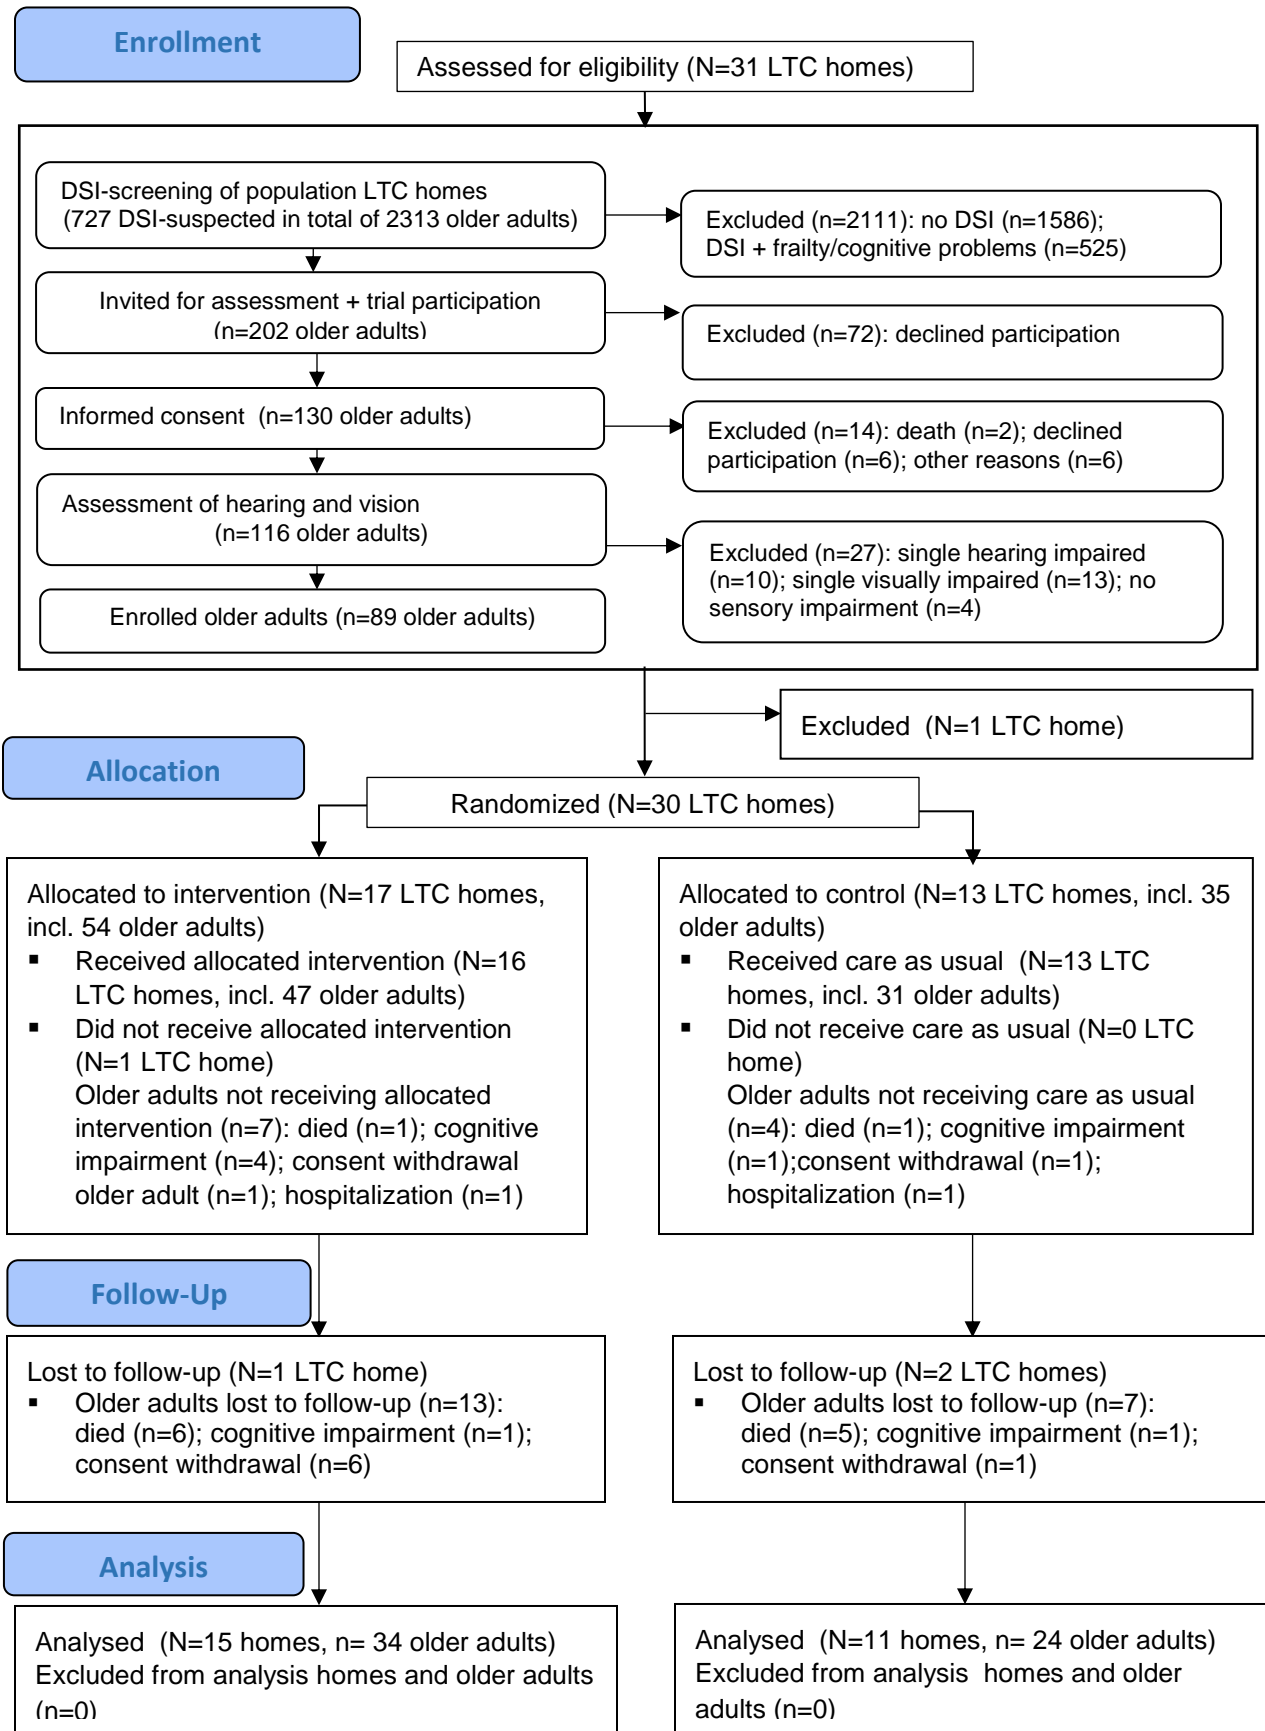

N = number LTC homes; n = number older adults.
